# Supplementary material
Source: PubMed Central journal article supplement (PMC3025636)
Supplement: supp_kwq168_kwq168_web_material.pdf [file supp_kwq168_kwq168_web_material.pdf]

## Web Appendix

### *Description of missing data:*

Analysis focused on missing data from the last three years of life for two reasons: 1) The median time between the last observation and death is 3.4 years, with 53.3% of participants having no weight information in this important period; and 2) The smallest inflection point identified in best-fitting models was 3 years before death.

**Web Table 1. Prevalence of missing data by age at death and cause of death**

|                | Missing in last 3 years (%) |
|----------------|-----------------------------|
| Age            |                             |
| 60-69          | 32.2                        |
| 70-79          | 41.2                        |
| 80-89          | 58.4                        |
| 90+            | 68.1                        |
| Cause of death |                             |
| Cancer         | 39.9                        |
| CVD            | 48.7                        |
| Other          | 65.9                        |

### *Sensitivity Analyses*

Four imputation schemes are described in the text. Models 1-5 were tested using each alternative imputation scheme to determine the extent to which missing data might influence selection of the best-fit model and best-fitting knot points. Analyses were conducted for all deaths, each age at death group, and each cause of death group. Additional analyses examined the potential effects of missing data on coefficients from Model 5 for all deaths and each age at death group.

**Web Table 2. Model fit comparisons (AIC) for models predicting weight by time to death under alternative missing scenarios**

|                                                                                                                                   |     | Model 1 | Model 2 | Model 3 | Model 4              | Model 5              |                |          |                 |          |
|-----------------------------------------------------------------------------------------------------------------------------------|-----|---------|---------|---------|----------------------|----------------------|----------------|----------|-----------------|----------|
|                                                                                                                                   | N   | AIC     | AIC     | AIC     | AIC                  | AIC                  | k1             | (95% CI) | k2              | (95% CI) |
| <b>a. Original data</b>                                                                                                           |     |         |         |         |                      |                      |                |          |                 |          |
| All deaths                                                                                                                        | 800 | 36942.4 | 36756.0 | 36084.9 | 35826.1              | 35783.0 <sup>a</sup> | 9              | (7, 10)  | 17              | (16, 18) |
| 60-69                                                                                                                             | 87  | 3288.7  | 3295.4  | 3250.4  | 3234.0               | 3230.0 <sup>a</sup>  | 3              | (1, 6)   | 15              | (8, 19)  |
| 70-79                                                                                                                             | 211 | 8972.3  | 8905.9  | 8701.0  | 8617.4               | 8606.9 <sup>a</sup>  | 7              | (6, 9)   | 18              | (17, 21) |
| 80-89                                                                                                                             | 320 | 15812.8 | 15752.0 | 15463.2 | 15376.8              | 15354.0 <sup>a</sup> | 3              | (2, 4)   | 16              | (14, 17) |
| 90+                                                                                                                               | 182 | 8726.2  | 8677.1  | 8471.3  | 8432.7               | 8399.8 <sup>a</sup>  | 10             | (9, 12)  | 16              | (14, 17) |
| Cancer deaths                                                                                                                     | 143 | 6626.5  | 6637.6  | 6558.2  | 6504.6               | 6495.2 <sup>a</sup>  | 3              | (2, 4)   | 17              | (15, 23) |
| CVD deaths                                                                                                                        | 349 | 14802.7 | 14681.4 | 14461.6 | 14330.2 <sup>a</sup> | 14340.0              | 8              | (7, 10)  | 19              | (17, 21) |
| Other deaths                                                                                                                      | 211 | 9655.3  | 9590.7  | 9429.2  | 9377.3               | 9345.7 <sup>a</sup>  | 9              | (8,11)   | 16              | (15, 18) |
| <b>b. Imputation 1: Assuming 4% weight loss since last visit for participants missing observations in last three years</b>        |     |         |         |         |                      |                      |                |          |                 |          |
| All deaths                                                                                                                        | 800 | 39337.2 | 39090.4 | 38378.1 | 38087.3              | 38040.6 <sup>a</sup> | 9              |          | 17              |          |
| 60-69                                                                                                                             | 87  | 3428.3  | 3434.9  | 3391.7  | 3376.7               | 3373.4 <sup>a</sup>  | 5              |          | 24 <sup>‡</sup> |          |
| 70-79                                                                                                                             | 211 | 9458.7  | 9382.4  | 9184.1  | 9089.9               | 9079.9 <sup>a</sup>  | 9              |          | 18              |          |
| 80-89                                                                                                                             | 320 | 16892.2 | 16802.1 | 16473.4 | 16386.5              | 16373.7 <sup>a</sup> | 3              |          | 15              |          |
| 90+                                                                                                                               | 182 | 9416.2  | 9344.5  | 9131.8  | 9081.3               | 9042.9 <sup>a</sup>  | 10             |          | 16              |          |
| Cancer deaths                                                                                                                     | 143 | 6924.5  | 6934.3  | 6856.0  | 6803.2               | 6796.6 <sup>a</sup>  | 3              |          | 17              |          |
| CVD deaths                                                                                                                        | 349 | 15736.3 | 15595.7 | 15363.8 | 15230.1 <sup>a</sup> | 15237.9              | 8              |          | 18              |          |
| Other deaths                                                                                                                      | 211 | 10486.7 | 10386.2 | 10189.6 | 10121.1              | 10084.0 <sup>a</sup> | 9              |          | 16              |          |
| <b>c. Imputation 2: Assuming 8% weight loss since last visit for participants missing observations in last three years</b>        |     |         |         |         |                      |                      |                |          |                 |          |
| All deaths                                                                                                                        | 800 | 40331.0 | 40055.0 | 39509.4 | 39299.6              | 39260.7 <sup>a</sup> | 9              |          | 17              |          |
| 60-69                                                                                                                             | 87  | 3496.2  | 3502.0  | 3470.3  | 3465.7               | 3455.2 <sup>a</sup>  | 3              |          | 6 <sup>‡</sup>  |          |
| 70-79                                                                                                                             | 211 | 9633.2  | 9550.3  | 9390.9  | 9322.3               | 9314.0 <sup>a</sup>  | 8              |          | 18              |          |
| 80-89                                                                                                                             | 320 | 17342.4 | 17239.1 | 16982.2 | 16932.8              | 16909.1 <sup>a</sup> | 9 <sup>‡</sup> |          | 17              |          |
| 90+                                                                                                                               | 182 | 9731.1  | 9647.3  | 9483.5  | 9448.1               | 9421.7 <sup>a</sup>  | 10             |          | 16              |          |
| Cancer deaths                                                                                                                     | 143 | 7072.2  | 7078.7  | 7019.0  | 6984.9               | 6981.5 <sup>a</sup>  | 3              |          | 18              |          |
| CVD deaths                                                                                                                        | 349 | 16126.7 | 15988.8 | 15816.3 | 15724.7 <sup>a</sup> | 15727.7              | 9              |          | 18              |          |
| Other deaths                                                                                                                      | 211 | 10829.1 | 10714.1 | 10558.5 | 10508.3              | 10471.9 <sup>a</sup> | 9              |          | 16              |          |
| <b>d. Imputation 3: Assuming 0.7% weight loss/year since last visit for participants missing observations in last three years</b> |     |         |         |         |                      |                      |                |          |                 |          |

|                                                                                                                            |     |         |         |                     |         |                      |     |  |     |  |
|----------------------------------------------------------------------------------------------------------------------------|-----|---------|---------|---------------------|---------|----------------------|-----|--|-----|--|
| All deaths                                                                                                                 | 800 | 40659.0 | 40488.7 | 40006.9             | 39855.0 | 39832.6 <sup>a</sup> | 9   |  | 17  |  |
| 60-69                                                                                                                      | 87  | 3534.0  | 3542.0  | 3512.1              | 3511.7  | 3497.8 <sup>a</sup>  | 3   |  | 6‡  |  |
| 70-79                                                                                                                      | 211 | 9693.2  | 9636.7  | 9483.1              | 9428.2  | 9423.9 <sup>a</sup>  | 7   |  | 18  |  |
| 80-89                                                                                                                      | 320 | 17479.2 | 17419.2 | 17199.4             | 17165.3 | 17146.0 <sup>a</sup> | 3   |  | 16  |  |
| 90+                                                                                                                        | 182 | 9836.0  | 9792.5  | 9663.1              | 9640.3  | 9622.6 <sup>a</sup>  | 10  |  | 17  |  |
| Cancer deaths                                                                                                              | 143 | 7091.5  | 7102.2  | 7043.0              | 7008.3  | 7000.3 <sup>a</sup>  | 3   |  | 18  |  |
| CVD deaths                                                                                                                 | 349 | 16234.0 | 16136.6 | 16215.2             | 15991.9 | 15917.5 <sup>a</sup> | 9   |  | 19  |  |
| Other deaths                                                                                                               | 211 | 10814.6 | 10740.8 | 10596.5             | 10563.7 | 10535.6 <sup>a</sup> | 9   |  | 16  |  |
| e. Imputation 4: Assuming 2.6% weight loss/year since last visit for participants missing observations in last three years |     |         |         |                     |         |                      |     |  |     |  |
| All deaths                                                                                                                 | 800 | 49283.7 | 49249.1 | 49215.2             | 49191.0 | 49185.2 <sup>a</sup> | 8   |  | 25‡ |  |
| 60-69                                                                                                                      | 87  | 4247.1  | 4256.0  | 4238.7              | 4251.2  | 4232.9 <sup>a</sup>  | 2   |  | 3‡  |  |
| 70-79                                                                                                                      | 211 | 11373.3 | 11362.3 | 11331.0             | 11314.7 | 11312.0 <sup>a</sup> | 9   |  | 27‡ |  |
| 80-89                                                                                                                      | 320 | 21346.1 | 21328.5 | 21323.9             | 21323.2 | 21314.0 <sup>a</sup> | 9‡  |  | 24‡ |  |
| 90+                                                                                                                        | 182 | 12257.5 | 12254.7 | 12235.7             | 12242.5 | 12228.2 <sup>a</sup> | 14‡ |  | 15  |  |
| Cancer deaths                                                                                                              | 143 | 8418.1  | 8427.7  | 8409.6 <sup>a</sup> | 8421.3  | 8412.3               | 3   |  | 4‡  |  |
| CVD deaths                                                                                                                 | 349 | 19561.6 | 19547.0 | 19528.5             | 19533.5 | 19523.3 <sup>a</sup> | 4‡  |  | 5‡  |  |
| Other deaths                                                                                                               | 211 | 13105.4 | 13079.7 | 13058.9             | 13062.9 | 13040.3 <sup>a</sup> | 9   |  | 16  |  |

†Indicates best-fitting model (lowest AIC)

‡Indicates knot beyond confidence intervals from (a)

**Web Table 3. Fixed effect coefficients from Model 5 under alternative missing scenarios predicting weight by time to death for all causes of death (N=800)**

| Age group (years)                                                                                                          | N   | Inflection points (years)       | Weight at death | P=    | Weight loss rate after inflection | P=    | Change in weight loss rate before inflection 1 | P=    | Change in weight loss rate before inflection 2 | P=    |
|----------------------------------------------------------------------------------------------------------------------------|-----|---------------------------------|-----------------|-------|-----------------------------------|-------|------------------------------------------------|-------|------------------------------------------------|-------|
|                                                                                                                            |     | k <sub>1</sub> , k <sub>2</sub> | B <sub>0</sub>  |       | B <sub>1</sub> (Time)             |       | B <sub>2</sub> (Time>k <sub>1</sub> )          |       | B <sub>3</sub> (Time>k <sub>2</sub> )          |       |
| a. Original data                                                                                                           |     |                                 |                 |       |                                   |       |                                                |       |                                                |       |
| Average model for all age groups                                                                                           |     |                                 |                 |       |                                   |       |                                                |       |                                                |       |
| 60-107                                                                                                                     | 800 | 9, 17                           | 73.517          | <.001 | 0.390                             | <.001 | -0.270                                         | <.001 | -0.109                                         | 0.019 |
| Model with varied knot and slopes by age group                                                                             |     |                                 |                 |       |                                   |       |                                                |       |                                                |       |
| 60-69                                                                                                                      | 87  | 3, 15                           | 77.850          | <.001 | 1.011                             | 0.001 | -1.123                                         | <.001 | -0.063                                         | 0.618 |
| 70-79                                                                                                                      | 211 | 7, 18                           | 75.781          | <.001 | 0.566                             | <.001 | -0.463                                         | 0.002 | -0.250                                         | 0.012 |
| 80-89                                                                                                                      | 320 | 3, 16                           | 70.903          | <.001 | 1.263                             | <.001 | -1.003                                         | 0.001 | -0.189                                         | 0.003 |
| 90+                                                                                                                        | 182 | 10, 16                          | 68.096          | <.001 | 0.468                             | <.001 | -0.267                                         | 0.036 | -0.099                                         | 0.256 |
| b. Imputation 1: Assuming 4% weight loss since last visit for participants missing observations in last three years        |     |                                 |                 |       |                                   |       |                                                |       |                                                |       |
| Average model for all age groups                                                                                           |     |                                 |                 |       |                                   |       |                                                |       |                                                |       |
| 60-107                                                                                                                     | 800 | 9, 17                           | 72.129          | <.001 | 0.489                             | <.001 | -0.321                                         | <.001 | -0.138                                         | 0.004 |
| Model with varied knot and slopes by age group                                                                             |     |                                 |                 |       |                                   |       |                                                |       |                                                |       |
| 60-69                                                                                                                      | 87  | 5, 24                           | 77.974          | <.001 | 0.436                             | 0.014 | -0.525                                         | 0.007 | -0.098                                         | 0.658 |
| 70-79                                                                                                                      | 211 | 9, 18                           | 75.287          | <.001 | 0.497                             | <.001 | -0.385                                         | 0.004 | -0.228                                         | 0.046 |
| 80-89                                                                                                                      | 320 | 3, 15                           | 69.775          | <.001 | 1.209                             | <.001 | -0.833                                         | 0.008 | -0.287                                         | 0.001 |
| 90+                                                                                                                        | 182 | 10,16                           | 66.310          | <.001 | 0.601                             | <.001 | -0.368                                         | 0.003 | -0.099                                         | 0.277 |
| c. Imputation 2: Assuming 8% weight loss since last visit for participants missing observations in last three years        |     |                                 |                 |       |                                   |       |                                                |       |                                                |       |
| Average model for all age groups                                                                                           |     |                                 |                 |       |                                   |       |                                                |       |                                                |       |
| 60-107                                                                                                                     | 800 | 9, 17                           | 70.854          | <.001 | 0.581                             | <.001 | -0.370                                         | <.001 | -0.164                                         | <.001 |
| Model with varied knot and slopes by age group                                                                             |     |                                 |                 |       |                                   |       |                                                |       |                                                |       |
| 60-69                                                                                                                      | 87  | 3, 6                            | 76.790          | <.001 | 0.948                             | 0.002 | -0.892                                         | 0.022 | -0.159                                         | 0.398 |
| 70-79                                                                                                                      | 211 | 8, 18                           | 74.068          | <.001 | 0.617                             | <.001 | -0.441                                         | 0.002 | -0.294                                         | 0.007 |
| 80-89                                                                                                                      | 320 | 9, 17                           | 70.023          | <.001 | 0.617                             | <.001 | -0.330                                         | <.001 | -0.192                                         | 0.009 |
| 90+                                                                                                                        | 182 | 10,16                           | 64.572          | <.001 | 0.733                             | <.001 | -0.460                                         | <.001 | -0.120                                         | 0.201 |
| d. Imputation 3: Assuming 0.7% weight loss/year since last visit for participants missing observations in last three years |     |                                 |                 |       |                                   |       |                                                |       |                                                |       |

Average model for all age groups

|        |     |       |        |       |       |       |        |       |        |       |
|--------|-----|-------|--------|-------|-------|-------|--------|-------|--------|-------|
| 60-107 | 800 | 9, 17 | 71.812 | <.001 | 0.430 | <.001 | -0.241 | <.001 | -0.108 | 0.030 |
|--------|-----|-------|--------|-------|-------|-------|--------|-------|--------|-------|

Model with varied knot and slopes by age group

|       |    |      |        |       |       |       |        |       |        |       |
|-------|----|------|--------|-------|-------|-------|--------|-------|--------|-------|
| 60-69 | 87 | 3, 6 | 76.614 | <.001 | 1.004 | 0.001 | -1.019 | 0.009 | -0.080 | 0.676 |
|-------|----|------|--------|-------|-------|-------|--------|-------|--------|-------|

|       |     |       |        |       |       |       |        |       |        |       |
|-------|-----|-------|--------|-------|-------|-------|--------|-------|--------|-------|
| 70-79 | 211 | 7, 18 | 74.533 | <.001 | 0.562 | <.001 | -0.408 | 0.005 | -0.228 | 0.030 |
|-------|-----|-------|--------|-------|-------|-------|--------|-------|--------|-------|

|       |     |       |        |       |       |       |        |       |        |       |
|-------|-----|-------|--------|-------|-------|-------|--------|-------|--------|-------|
| 80-89 | 320 | 3, 16 | 69.235 | <.001 | 1.217 | <.001 | -0.882 | 0.004 | -0.210 | 0.002 |
|-------|-----|-------|--------|-------|-------|-------|--------|-------|--------|-------|

|     |     |       |        |       |       |       |        |       |        |       |
|-----|-----|-------|--------|-------|-------|-------|--------|-------|--------|-------|
| 90+ | 182 | 10,17 | 66.079 | <.001 | 0.535 | <.001 | -0.293 | 0.015 | -0.048 | 0.601 |
|-----|-----|-------|--------|-------|-------|-------|--------|-------|--------|-------|

e. Imputation 4: Assuming 2.6% weight loss/year since last visit for participants missing observations in last three years

Average model for all age groups, all causes of death (N=800)

|        |     |       |        |       |       |       |        |       |        |       |
|--------|-----|-------|--------|-------|-------|-------|--------|-------|--------|-------|
| 60-107 | 800 | 8, 25 | 69.647 | <.001 | 0.400 | <.001 | -0.153 | 0.025 | -0.238 | <.001 |
|--------|-----|-------|--------|-------|-------|-------|--------|-------|--------|-------|

Model with varied knot and slopes by age group, all causes of death (N=800)

|       |    |      |        |       |       |       |        |       |        |       |
|-------|----|------|--------|-------|-------|-------|--------|-------|--------|-------|
| 60-69 | 87 | 2, 3 | 74.068 | <.001 | 1.439 | 0.017 | -0.956 | 0.430 | -0.501 | 0.533 |
|-------|----|------|--------|-------|-------|-------|--------|-------|--------|-------|

|       |     |       |        |       |       |       |        |       |        |       |
|-------|-----|-------|--------|-------|-------|-------|--------|-------|--------|-------|
| 70-79 | 211 | 9, 27 | 72.716 | <.001 | 0.465 | <.001 | -0.359 | <.001 | -0.267 | 0.188 |
|-------|-----|-------|--------|-------|-------|-------|--------|-------|--------|-------|

|       |     |       |        |       |       |       |        |       |        |       |
|-------|-----|-------|--------|-------|-------|-------|--------|-------|--------|-------|
| 80-89 | 320 | 9, 24 | 68.934 | <.001 | 0.408 | <.001 | -0.099 | 0.243 | -0.295 | <.001 |
|-------|-----|-------|--------|-------|-------|-------|--------|-------|--------|-------|

|     |     |       |        |       |       |       |        |       |       |       |
|-----|-----|-------|--------|-------|-------|-------|--------|-------|-------|-------|
| 90+ | 182 | 14,15 | 63.475 | <.001 | 0.504 | <.001 | -0.500 | 0.375 | 0.285 | 0.617 |
|-----|-----|-------|--------|-------|-------|-------|--------|-------|-------|-------|

---
